# Supplementary material for: A Fucosylated Glycopeptide as a Candidate Biomarker for Early Diagnosis of NASH Hepatocellular Carcinoma Using a Stepped HCD Method and PRM Evaluation
Source: Front Oncol. 2022 Mar 17;12:818001. doi: 10.3389/fonc.2022.818001 (PMC8970044; doi:10.3389/fonc.2022.818001)
Supplement: Supplementary Table S1 — PRM precursor ions list of ceruloplasmin. [file Table_1.xlsx]

## Sheet: Sheet1
Protein name | ID | Abbr_Glycosite	Compound	m/z	z	t start (min)	t stop (min)
Ceruloplasmin|P00450|CERU_762	ELHHLQEQNVSNAFLDK_HexNAc(4)Hex(5)NeuAc(2)	1057.45	4	26.7	31.7
	ELHHLQEQNVSNAFLDK_HexNAc(4)Hex(5)Fuc(1)NeuAc(2)	1458.28	3	26.2	31.2
	ELHHLQEQNVSNAFLDK_HexNAc(5)Hex(6)NeuAc(3)	1221.51	4	29.2	34.2
	ELHHLQEQNVSNAFLDK_HexNAc(5)Hex(6)Fuc(1)NeuAc(3)	1677.03	3	28.9	33.9
	ELHHLQEQNVSNAFLDK_HexNAc(5)Hex(6)Fuc(2)NeuAc(3)	1294.54	4	28.82	33.82
Ceruloplasmin|P00450|CERU_397	ENLTAPGSDSAVFFEQGTTR__HexNAc(4)Hex(5)NeuAc(2)	1444.6	3	39.87	44.87
	ENLTAPGSDSAVFFEQGTTR_HexNAc(4)Hex(5)Fuc(1)NeuAc(2)	1120.21	4	39.65	44.65
	ENLTAPGSDSAVFFEQGTTR_HexNAc(5)Hex(6)NeuAc(3)	1248.01	4	47.44	52.44
	ENLTAPGSDSAVFFEQGTTR_HexNAc(5)Hex(6)Fuc(1)NeuAc(3)	1284.27	4	47.1	52.1
	ENLTAPGSDSAVFFEQGTTR_HexNAc(5)Hex(6)Fuc(2)NeuAc(3)	1320.78	4	47.32	52.32
Ceruloplasmin|P00450|CERU_138	EHEGAIYPDNTTDFQR_HexNAc(4)Hex(5)NeuAc(2)	1366.54	3	25.98	30.98
	EHEGAIYPDNTTDFQR_HexNAc(4)Hex(5)Fuc(1)NeuAc(2)	1415.23	3	25.74	30.74
	EHEGAIYPDNTTDFQR_HexNAc(5)Hex(6)NeuAc(3)	1585.3	3	29.64	34.64
	EHEGAIYPDNTTDFQR_HexNAc(5)Hex(6)Fuc(1)NeuAc(3)	1225.73	4	29.79	34.79
	EHEGAIYPDNTTDFQR_HexNAc(5)Hex(6)Fuc(2)NeuAc(3)	1262.25	4	29.7	34.7
	EHEGAIYPDNTTDFQR_HexNAc(6)Hex(7)	1415.9	3	25.91	30.91
Ceruloplasmin|P00450|CERU_346	AGLQAFFQVQECNK_HexNAc(5)Hex(6)NeuAc(3)	1125.95	4	50.41	55.41
	AGLQAFFQVQECNK_HexNAc(4)Hex(5)NeuAc(2)	961.89	4	42.65	47.65
